# Supplementary material
Source: publisher site journal article supplement (https://www.dovepress.com/article/255941)
Supplement: Supplementary file 1 [file get_supplementary_file.php]

1

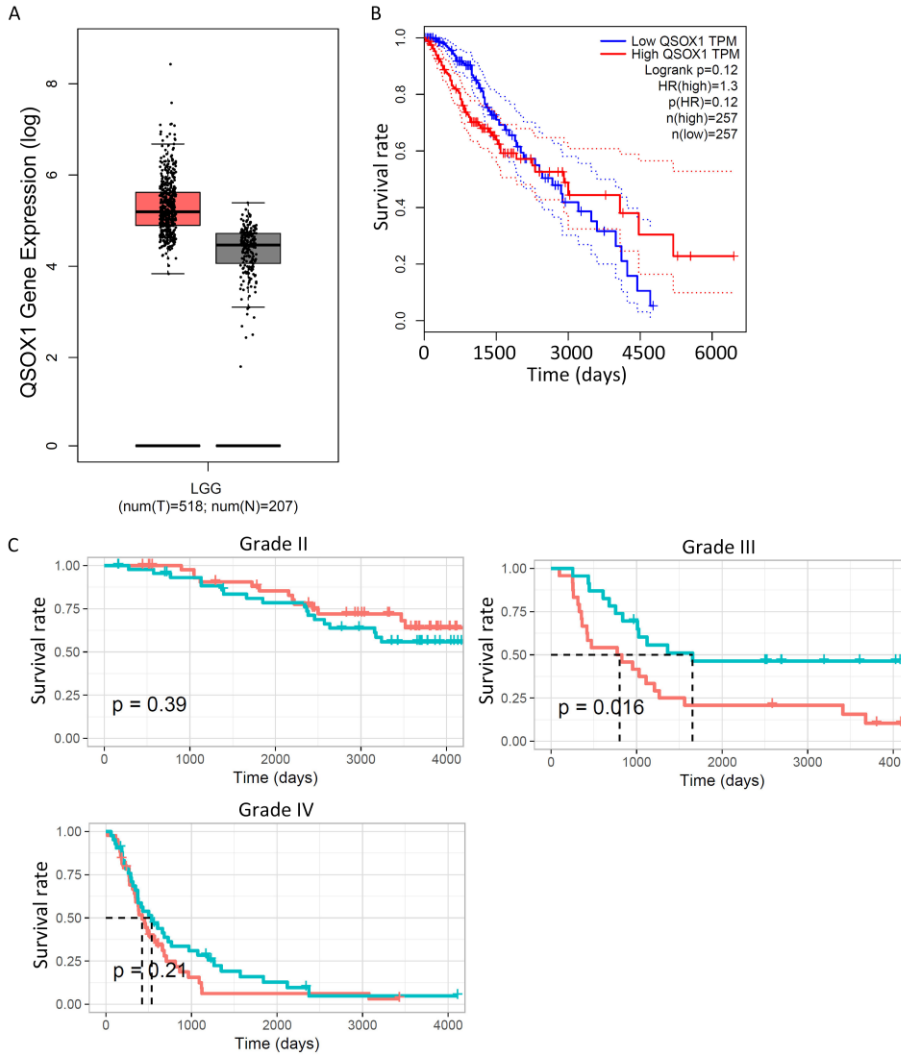

2

3

4

5 **Supplementary Figure 1** The clinical significance of QSOX1 in different grades of glioma (**A-C**).

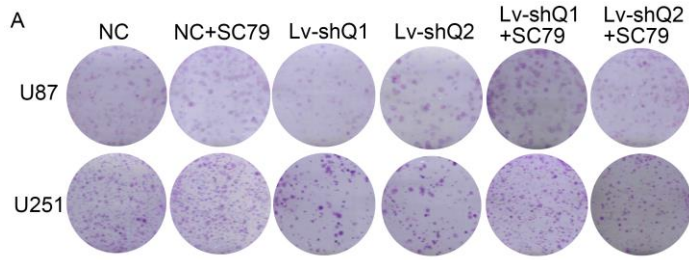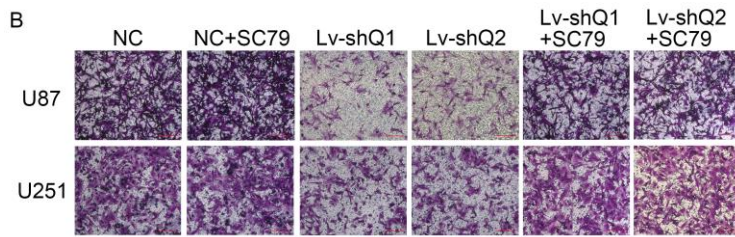

6

7

8 **Supplementary Figure 2** The PI3K/Akt pathway activator reversed the effects of QSOX1

9 knockdown on cell growth in vitro (**A, B**).
